# Supplementary material for: UK cost-effectiveness analysis of endoscopic sleeve gastroplasty versus lifestyle modification alone for adults with class II obesity
Source: Springer Nature journal article supplement (doi:10.1038/s41366-023-01374-6), 2023-09-06
Supplement: MOESM1 [file 41366_2023_1374_MOESM1_ESM.pdf]

## Supplementary Appendix

|                                                                                                                                                       |    |
|-------------------------------------------------------------------------------------------------------------------------------------------------------|----|
| Table S1: Consolidated Health Economic Evaluation Reporting Standards (CHEERS) checklist.....                                                         | 2  |
| Table S2: Health state utility estimates based on MERIT study data and published literature .....                                                     | 4  |
| Table S3: Health state utility linear mixed-effects model results .....                                                                               | 5  |
| Table S4: Health state utility estimates for the obesity I, II, and III model health states based on results from the linear mixed-effects model..... | 6  |
| Table S5: Estimated prevalence of sleep apnoea by model health state based on study by Wall et al, 2012.....                                          | 7  |
| Table S6: Estimated prevalence of non-alcoholic fatty liver disease by model health state based on study by Vusirikala et al, 2020.....               | 8  |
| Table S7: Estimated prevalence of gastro-oesophageal reflux disease by model health state based on study by Jacobson et al, 2012.....                 | 9  |
| Table S8: Estimated costs of lifestyle management .....                                                                                               | 10 |
| Table S9: Estimated costs of hypertension .....                                                                                                       | 11 |
| Table S10: Estimated total comorbidity treatment cost by model health state .....                                                                     | 12 |
| Table S11: Disaggregated base-case results: life years.....                                                                                           | 13 |
| Table S12: Disaggregated base-case results: QALYs.....                                                                                                | 14 |
| Table S13: Disaggregated base-case results: costs.....                                                                                                | 15 |
| Table S14: Full scenario analysis results .....                                                                                                       | 16 |
| Figure S1: Projected mortality for patients receiving ESG or lifestyle modification alone over the model time horizon.....                            | 19 |
| Figure S2: Probabilistic sensitivity analysis results: incremental cost-effectiveness plane.....                                                      | 20 |
| Figure S3: Probabilistic sensitivity analysis results: cost-effectiveness acceptability curve.....                                                    | 21 |

**Table S1: Consolidated Health Economic Evaluation Reporting Standards (CHEERS) checklist**

|    | <b>CHEERS domain</b>                             | <b>Description</b>                                                                                                                              | <b>Location in article</b> |
|----|--------------------------------------------------|-------------------------------------------------------------------------------------------------------------------------------------------------|----------------------------|
| 1  | Title                                            | Identify the study as an economic evaluation and specify the interventions being compared.                                                      | Title                      |
| 2  | Abstract                                         | Provide a structured summary that highlights context, key methods, results, and alternative analyses.                                           | Abstract                   |
| 3  | Introduction: Background and Objectives          | Give the context for the study, the study question, and its practical relevance for decision making in policy or practice.                      | Introduction               |
| 4  | Health economic analysis plan                    | Indicate whether a health economic analysis plan was developed and where available.                                                             | Methods                    |
| 5  | Study population                                 | Describe characteristics of the study population (such as age range, demographics, socioeconomic, or clinical characteristics).                 | Methods                    |
| 6  | Setting and location                             | Provide relevant contextual information that may influence findings.                                                                            | Methods                    |
| 7  | Comparators                                      | Describe the interventions or strategies being compared and why chosen.                                                                         | Methods                    |
| 8  | Perspective                                      | State the perspective(s) adopted by the study and why chosen.                                                                                   | Methods                    |
| 9  | Time horizon                                     | State the time horizon for the study and why appropriate.                                                                                       | Methods                    |
| 10 | Discount rate                                    | Report the discount rate(s) and reason chosen.                                                                                                  | Methods                    |
| 11 | Selection of outcomes                            | Describe what outcomes were used as the measure(s) of benefit(s) and harm(s).                                                                   | Methods                    |
| 12 | Measurement of outcomes                          | Describe how outcomes used to capture benefit(s) and harm(s) were measured.                                                                     | Methods                    |
| 13 | Valuation of outcomes                            | Describe the population and methods used to measure and value outcomes.                                                                         | Methods                    |
| 14 | Measurement and valuation of resources and costs | Describe how costs were valued.                                                                                                                 | Methods                    |
| 15 | Currency, price date, and conversion             | Report the dates of the estimated resource quantities and unit costs, plus the currency and year of conversion.                                 | Methods                    |
| 16 | Rationale and description of model               | If modeling is used, describe in detail and why used. Report if the model is publicly available and where it can be accessed.                   | Methods                    |
| 17 | Analytics and assumptions                        | Describe any methods for analyzing or statistically transforming data, any extrapolation methods, and approaches for validating any model used. | Methods                    |
| 18 | Characterizing                                   | Describe any methods used for estimating how the                                                                                                | Methods                    |

|    |                                                                       |                                                                                                                                                                           |                                                                                                       |
|----|-----------------------------------------------------------------------|---------------------------------------------------------------------------------------------------------------------------------------------------------------------------|-------------------------------------------------------------------------------------------------------|
|    | heterogeneity                                                         | results of the study vary for subgroups.                                                                                                                                  |                                                                                                       |
| 19 | Characterizing distributional effects                                 | Describe how impacts are distributed across different individuals or adjustments made to reflect priority populations.                                                    | Discussion                                                                                            |
| 20 | Characterizing uncertainty                                            | Describe methods to characterize any sources of uncertainty in the analysis.                                                                                              | Methods                                                                                               |
| 21 | Approach to engagement with patients and others affected by the study | Describe any approaches to engage patients or service recipients, the general public, communities, or stakeholders (eg, clinicians or payers) in the design of the study. | Methods                                                                                               |
| 22 | Study parameters                                                      | Report all analytic inputs (eg, values, ranges, references) including uncertainty or distributional assumptions.                                                          | Methods;<br>Tables (1, 2, S2-10); Figures (2, S1);<br>Additional supplementary materials <sup>a</sup> |
| 23 | Summary of main results                                               | Report the mean values for the main categories of costs and outcomes of interest and summarize them in the most appropriate overall measure.                              | Methods;<br>Tables (1-3, S2, S14); Figure 2                                                           |
| 24 | Effect of uncertainty                                                 | Describe how uncertainty about analytic judgments, inputs, or projections affects findings. Report the effect of choice of discount rate and time horizon, if applicable. | Methods;<br>Discussion;<br>Tables (3, S14);<br>Figure 3                                               |
| 25 | Effect of engagement with patients and others affected by the study   | Report on any difference patient/service recipient, general public, community, or stakeholder involvement made to the approach or findings of the study.                  | Methods                                                                                               |
| 26 | Study findings, limitations, generalizability, and current knowledge  | Report key findings, limitations, ethical, or equity considerations not captured and how these could impact patients, policy, or practice.                                | Results;<br>Discussion                                                                                |
| 27 | Study funding                                                         | Describe how the study was funded and any role of the funder in the identification, design, conduct, and reporting of the analysis.                                       | Sources of funding                                                                                    |
| 28 | Conflicts of interest                                                 | Report authors' conflicts of interest according to journal or International Committee of Medical Journal Editors requirements.                                            | Financial declarations                                                                                |

---

Note: Checklist published by Husereau et al, 2022 [\[1\]](#).

<sup>a</sup> Model parameter sheet provided as a standalone Microsoft® Excel file.

**Table S2: Health state utility estimates based on MERIT study data and published literature**

| Model health state | Based on MERIT study data <sup>a</sup> |                                         |                                       | Health state utility value reported by Stephenson et al. |
|--------------------|----------------------------------------|-----------------------------------------|---------------------------------------|----------------------------------------------------------|
|                    | Number of SF-36 observations           | EQ-5D value (Rowen et al.) <sup>b</sup> | EQ-5D value (Ara et al.) <sup>c</sup> |                                                          |
| Healthy weight     | 0                                      | N/A                                     | N/A                                   | 0.85                                                     |
| Overweight         | 28                                     | 0.95                                    | 0.96                                  | 0.81                                                     |
| Obesity I          | 179                                    | 0.90                                    | 0.91                                  | 0.73                                                     |
| Obesity II         | 155                                    | 0.81                                    | 0.81                                  | 0.73                                                     |
| Obesity III        | 14                                     | 0.71                                    | 0.70                                  | 0.62                                                     |

<sup>a</sup> SF-36 data from the MERIT study (class II obesity subpopulation) [2], mapped to EQ-5D using algorithms published by Rowen et al, 2009 [3] and Ara and Brazier, 2008 [4].

<sup>b</sup> Mapping algorithm used in the base-case analysis.

<sup>c</sup> Mapping algorithm explored in a model scenario analysis.

EQ-5D EuroQol five dimensions health survey, SF-36 36-item short form health survey.

**Table S3: Health state utility linear mixed-effects model results**

|                                    | Coefficient | Standard Error | P-value |
|------------------------------------|-------------|----------------|---------|
| Rowen et al, 2009 <sup>a</sup>     |             |                |         |
| Intercept (Overweight)             | 0.92        | 0.03           | 0.00    |
| Obesity I                          | -0.03       | 0.03           | 0.96    |
| Obesity II                         | -0.11       | 0.03           | 0.91    |
| Obesity III                        | -0.20       | 0.04           | 0.70    |
| Ara and Brazier, 2008 <sup>b</sup> |             |                |         |
| Intercept (Overweight)             | 0.94        | 0.03           | 0.00    |
| Obesity I                          | -0.04       | 0.03           | 0.07    |
| Obesity II                         | -0.13       | 0.03           | 0.00    |
| Obesity III                        | -0.23       | 0.04           | 0.00    |

Note: Results from a linear mixed-effects regression model used to assess the incremental difference between the overweight health state utility value (0.81) reported by Stephenson et al, 2021 [5] and the EQ-5D values for the obesity I, obesity II, and obesity III model health states mapped from MERIT SF-36 data using algorithms published by Rowen et al, 2009 [3] and Ara and Brazier, 2008 [4].

<sup>a</sup> Mapping algorithm used in the base-case analysis.

<sup>b</sup> Mapping algorithm explored in a model scenario analysis.

EQ-5D EuroQol five dimensions health survey, SF-36 36-item short form health survey.

**Table S4: Health state utility estimates for the obesity I, II, and III model health states based on results from the linear mixed-effects model**

| Model health state | Utility estimates based on MERIT SF-36 data mapped to EQ-5D |                                                   | Utility reported by Stephenson et al, 2021 |
|--------------------|-------------------------------------------------------------|---------------------------------------------------|--------------------------------------------|
|                    | Algorithm from Rowen et al, 2009 <sup>b</sup>               | Algorithm from Ara and Brazier, 2008 <sup>c</sup> |                                            |
| Obesity I          | 0.78                                                        | 0.77                                              | 0.73                                       |
| Obesity II         | 0.70                                                        | 0.68                                              | 0.73                                       |
| Obesity III        | 0.61                                                        | 0.58                                              | 0.62                                       |

<sup>a</sup> SF-36 data from MERIT (class II obesity subpopulation) [2], mapped to EQ-5D using algorithms published by Rowen et al, 2009 [3] and Ara and Brazier, 2008 [4]. Health state utility estimate calculated by applying the disutility generated from the linear mixed-effects model to the overweight health state utility value (0.81) reported by Stephenson et al, 2021 [5].

<sup>b</sup> Mapping algorithm used in the base-case analysis.

<sup>c</sup> Mapping algorithm explored in a model scenario analysis.

EQ-5D EuroQol five dimensions health survey, SF-36 36-item short form health survey.

**Table S5: Estimated prevalence of sleep apnoea by model health state based on study by Wall et al, 2012**

| Model health state                    | Total sample size | Number of cases | Estimated prevalence <sup>b</sup> |
|---------------------------------------|-------------------|-----------------|-----------------------------------|
| Healthy weight                        | 343 543           | 699             | 0.20%                             |
| Overweight                            | 382 472           | 1943            | 0.51%                             |
| Obesity I and Obesity II <sup>a</sup> | 191 306           | 2853            | 0.51%                             |
| Obesity III                           | 16 323            | 762             | 4.67%                             |

<sup>a</sup> Publication by Wall et al, 2012 [\[6\]](#) reports data for a group defined by a BMI range covering both the obesity I and obesity II model health states.

<sup>b</sup> Calculated as proportion of cases among the total sample.

**Table S6: Estimated prevalence of non-alcoholic fatty liver disease by model health state based on study by Vusirikala et al, 2020**

| Model health state                                  | Body size phenotype category                    | Total sample size | Number of cases | Estimated prevalence <sup>b</sup> |
|-----------------------------------------------------|-------------------------------------------------|-------------------|-----------------|-----------------------------------|
| Healthy weight                                      | Normal weight, 0 metabolic abnormalities        | 1 367 321         | 882             | 0.09%                             |
|                                                     | Normal weight, 1 metabolic abnormality          | 223 270           | 377             |                                   |
|                                                     | Normal weight, $\geq 2$ metabolic abnormalities | 116 341           | 219             |                                   |
| Overweight                                          | Overweight, 0 metabolic abnormalities           | 852 223           | 2112            | 0.34%                             |
|                                                     | Overweight, 1 metabolic abnormality             | 307 553           | 1437            |                                   |
|                                                     | Overweight, $\geq 2$ metabolic abnormalities    | 218 120           | 1158            |                                   |
| Obesity I, Obesity II, and Obesity III <sup>a</sup> | Obese, 0 metabolic abnormalities                | 466 571           | 2506            | 0.72%                             |
|                                                     | Obese, 1 metabolic abnormality                  | 232 795           | 1909            |                                   |
|                                                     | Obese, $\geq 2$ metabolic abnormalities         | 226 771           | 2237            |                                   |

<sup>a</sup> Publication by Vusirikala et al, 2020 [7] reports data for an overall obese group defined by a BMI range covering the obesity I, obesity II, and obesity III model health states.

<sup>b</sup> Calculated as proportion of total number of incident cases across reported phenotype categories among the total sample size across reported phenotype categories for each model health state.



**Table S7: Estimated prevalence of gastro-oesophageal reflux disease by model health state based on study by Jacobson et al, 2012**

|                                         | Number of cases | Number of controls | Total sample size | Estimated prevalence <sup>d</sup> |
|-----------------------------------------|-----------------|--------------------|-------------------|-----------------------------------|
| Healthy weight <sup>a</sup>             | 776             | 6173               | 6949              | 11.17%                            |
| Overweight <sup>b</sup>                 | 959             | 3580               | 4539              | 21.13%                            |
| Obesity I                               | 458             | 1258               | 1716              | 26.69%                            |
| Obesity II and Obesity III <sup>c</sup> | 214             | 591                | 805               | 26.58%                            |

<sup>a</sup> Total mild/moderate/severe cases and controls reported across BMI groups < 22.00 kg/m<sup>2</sup>, 20.00-22.49 kg/m<sup>2</sup>, and 22.50-24.99 kg/m<sup>2</sup>.

<sup>b</sup> Total mild/moderate/severe cases and controls reported across BMI groups < 25.00-27.49 kg/m<sup>2</sup> and 27.50-29.99 kg/m<sup>2</sup>.

<sup>c</sup> Publication by Jacobson et al, 2012 [8] reports data for a group defined by a BMI range covering both the obesity II and obesity III model health states.

<sup>d</sup> Calculated as the proportion of cases among total observations.

**Table S8: Estimated costs of lifestyle management**

|                                                 | Annual frequency per patient | Unit cost (£) | Annual cost per patient (£) | Cost source          |
|-------------------------------------------------|------------------------------|---------------|-----------------------------|----------------------|
| GP consultation <sup>a</sup>                    | 2                            | 39.23         | 78.46                       | <a href="#">[9]</a>  |
| Nurse consultation <sup>b</sup>                 | 4                            | 13.75         | 55.00                       | <a href="#">[9]</a>  |
| Dietician consultation <sup>c</sup>             | 3                            | 10.57         | 31.70                       | <a href="#">[9]</a>  |
| Specialist consultation <sup>d</sup>            | 2                            | 27.32         | 54.63                       | <a href="#">[9]</a>  |
| Blood count                                     | 2                            | 2.53          | 5.06                        | <a href="#">[10]</a> |
| Clinical psychologist consultation <sup>e</sup> | 2                            | 32.50         | 65.00                       | <a href="#">[10]</a> |
| Total                                           |                              |               | 289.85                      |                      |

Note: All costs are 2020/21 values. With the exception of clinical psychologist consultations which were incorporated based on feedback from the clinical expert authors, the cost components and their annual frequencies were based on the approach taken in NICE's appraisal of liraglutide for the treatment of obesity [\[11\]](#).

<sup>a</sup> Per surgery consultation lasting 9.22 min, with qualification costs, including direct care staff costs.

<sup>b</sup> Band 6 nurse: £55/h, 15 min duration assumed.

<sup>c</sup> Band 5 dietitian: £41/h, 15 min duration assumed.

<sup>d</sup> Band 6 dietician: £53/h, 15 min duration assumed.

<sup>e</sup> Band 7 clinical psychologist: £65/h, 30 min duration assumed.

GP general practitioner.

**Table S9: Estimated costs of hypertension**

|                                                    | Enalapril            | Lisinopril           | Perindopril          | Ramipril             |
|----------------------------------------------------|----------------------|----------------------|----------------------|----------------------|
| Cost source                                        | <a href="#">[12]</a> | <a href="#">[13]</a> | <a href="#">[14]</a> | <a href="#">[15]</a> |
| Daily dose, mg                                     | 10.0                 | 20.0                 | 4.0                  | 2.5                  |
| Drug tariff price, £                               | 3.35                 | 1.00                 | 1.41                 | 1.09                 |
| Tablet size associated with NHS price              | 5                    | 10                   | 4                    | 2.5                  |
| Number of tablets in a pack                        | 28                   | 28                   | 30                   | 28                   |
| Total costs per day, £                             | 0.24                 | 0.07                 | 0.05                 | 0.04                 |
| Total costs per year, £                            | 87.34                | 26.07                | 17.16                | 14.21                |
| Mean annual cost (all medications), £ <sup>a</sup> | 36.19                |                      |                      |                      |

Note: All costs are 2020/21 values.

<sup>a</sup> Based on the approach taken in NICE's appraisal of liraglutide for the treatment of obesity [\[11\]](#).

NHS National Health Service.

**Table S10: Estimated total comorbidity treatment cost by model health state**

| Model health state | Annual cost (£) <sup>a</sup> |
|--------------------|------------------------------|
| Healthy weight     | 112.26                       |
| Overweight         | 247.78                       |
| Obesity I          | 424.33                       |
| Obesity II         | 538.88                       |
| Obesity III        | 756.90                       |

<sup>a</sup> Calculated for each health state by multiplying the annual cost per patient of treating each comorbidity by the estimated prevalence of each comorbidity within each health state.

**Table S11: Disaggregated base-case results: life years**

| <b>Model health state</b> | <b>LYs ESG</b> | <b>LYs LM alone</b> | <b>Increment (ESG vs LM)</b> | <b>Absolute increment (ESG vs LM)</b> | <b>Percent absolute increment (ESG vs LM)</b> |
|---------------------------|----------------|---------------------|------------------------------|---------------------------------------|-----------------------------------------------|
| Healthy weight            | 0.000          | 0.000               | 0.000                        | 0.000                                 | 0%                                            |
| Overweight                | 1.689          | 0.000               | 1.689                        | 1.689                                 | 131%                                          |
| Obesity I                 | 11.756         | 0.520               | 11.237                       | 11.237                                | 869%                                          |
| Obesity II                | 7.420          | 20.134              | -12.714                      | 12.714                                | 983%                                          |
| Obesity III               | 0.408          | 0.289               | 0.119                        | 0.119                                 | 9%                                            |
| Total                     | 21.274         | 20.943              | 0.331                        | 0.331                                 | 26%                                           |

Note: 3.5% annual discount rate applied to costs and health effects.

ESG endoscopic sleeve gastroplasty, LM lifestyle modification, QALY quality-adjusted life year.

**Table S12: Disaggregated base-case results: QALYs**

|                | <b>QALYs<br/>ESG</b> | <b>QALYs<br/>LM alone</b> | <b>Increment<br/>(ESG vs LM)</b> | <b>Absolute<br/>increment<br/>(ESG vs LM)</b> | <b>Percent<br/>absolute<br/>increment<br/>(ESG vs LM)</b> |
|----------------|----------------------|---------------------------|----------------------------------|-----------------------------------------------|-----------------------------------------------------------|
| Healthy weight | 0.000                | 0.000                     | 0.000                            | 0.000                                         | 0%                                                        |
| Overweight     | 1.305                | 0.000                     | 1.305                            | 1.305                                         | 39%                                                       |
| Obesity I      | 8.755                | 0.405                     | 8.349                            | 8.349                                         | 293%                                                      |
| Obesity II     | 5.613                | 14.094                    | -8.481                           | 8.481                                         | 238%                                                      |
| Obesity III    | 0.237                | 0.176                     | 0.060                            | 0.060                                         | 6%                                                        |
| Total          | 15.909               | 14.676                    | 1.233                            | 1.233                                         | 100%                                                      |

Note: 3.5% annual discount rate applied to costs and health effects.

ESG endoscopic sleeve gastroplasty, LM lifestyle modification, QALY quality-adjusted life year.

**Table S13: Disaggregated base-case results: costs**

|                          | <b>Costs<br/>ESG</b> | <b>Costs<br/>LM alone</b> | <b>Increment<br/>(ESG vs LM<br/>alone)</b> | <b>Absolute<br/>increment<br/>(ESG vs LM<br/>alone)</b> | <b>Percent<br/>absolute<br/>increment<br/>(ESG vs LM<br/>alone)</b> |
|--------------------------|----------------------|---------------------------|--------------------------------------------|---------------------------------------------------------|---------------------------------------------------------------------|
| Costs by health state, £ |                      |                           |                                            |                                                         |                                                                     |
| Healthy weight           | 0                    | 0                         | 0                                          | 0                                                       | 0%                                                                  |
| Overweight               | 1176                 | 0                         | 1176                                       | 1176                                                    | 39%                                                                 |
| Obesity I                | 9163                 | 295                       | 8868                                       | 8868                                                    | 293%                                                                |
| Obesity II               | 8813                 | 16 019                    | -7207                                      | 7207                                                    | 238%                                                                |
| Obesity III              | 406                  | 220                       | 186                                        | 186                                                     | 6%                                                                  |
| Total                    | 19 558               | 16 534                    | 3024                                       | 3024                                                    | 100%                                                                |
| Costs by cost category   |                      |                           |                                            |                                                         |                                                                     |
| Treatment costs          | 10 161               | 5783                      | 4378                                       | 4378                                                    | 145%                                                                |
| Comorbidity costs        | 9343                 | 10 750                    | -1408                                      | 1408                                                    | 47%                                                                 |
| Adverse event costs      | 54                   | 0                         | 54                                         | 54                                                      | 2%                                                                  |
| Total                    | 19 558               | 16 534                    | 3024                                       | 3024                                                    | 100%                                                                |

Note: All costs are 2020/21 values; 3.5% annual discount rate applied to costs and health effects.  
*ESG* endoscopic sleeve gastroplasty, *LM* lifestyle modification.

**Table S14: Full scenario analysis results**

|                                                                                                                                            | Costs (£) | Life years | QALYs  | ICER (£/QALY) |
|--------------------------------------------------------------------------------------------------------------------------------------------|-----------|------------|--------|---------------|
| Base-case results                                                                                                                          |           |            |        |               |
| ESG                                                                                                                                        | 19 558    | 21.257     | 15.909 |               |
| LM alone                                                                                                                                   | 16 534    | 20.943     | 14.676 |               |
| Incremental (ESG vs LM)                                                                                                                    | 3024      | 1.233      | 2.453  | 2453          |
| Scenario 1: Alternative extrapolation for ESG (BMI plateau following end of trial observation period)                                      |           |            |        |               |
| ESG                                                                                                                                        | 19 321    | 21.324     | 16.140 |               |
| LM alone                                                                                                                                   | 16 534    | 20.943     | 14.676 |               |
| Incremental (ESG vs LM)                                                                                                                    | 2787      | 0.381      | 1.464  | 1903          |
| Scenario 2: Alternative extrapolation for ESG (following end of the trial observation period, 30% return to baseline BMI group by year 5)  |           |            |        |               |
| ESG                                                                                                                                        | 19 681    | 21.222     | 15.789 |               |
| LM alone                                                                                                                                   | 16 534    | 20.943     | 14.676 |               |
| Incremental (ESG vs LM)                                                                                                                    | 3147      | 0.279      | 1.113  | 2828          |
| Scenario 3: Alternative extrapolation for ESG (following end of the trial observation period, 40% return to baseline BMI group by year 5)  |           |            |        |               |
| ESG                                                                                                                                        | 19 804    | 21.187     | 15.669 |               |
| LM alone                                                                                                                                   | 16 534    | 20.943     | 14.676 |               |
| Incremental (ESG vs LM)                                                                                                                    | 3271      | 0.243      | 0.993  | 3294          |
| Scenario 4: Alternative extrapolation for ESG (following end of the trial observation period, 50% return to baseline BMI group by year 5)  |           |            |        |               |
| ESG                                                                                                                                        | 19 927    | 21.151     | 15.549 |               |
| LM alone                                                                                                                                   | 16 534    | 20.943     | 14.676 |               |
| Incremental (ESG vs LM)                                                                                                                    | 3394      | 0.208      | 0.873  | 3888          |
| Scenario 5: Alternative extrapolation for ESG (following end of the trial observation period, 60% return to baseline BMI group by year 5)  |           |            |        |               |
| ESG                                                                                                                                        | 20 051    | 21.116     | 15.428 |               |
| LM alone                                                                                                                                   | 16 534    | 20.943     | 14.676 |               |
| Incremental (ESG vs LM)                                                                                                                    | 3517      | 0.173      | 0.753  | 4672          |
| Scenario 6: Alternative extrapolation for ESG (following end of the trial observation period, 70% return to baseline BMI group by year 5)  |           |            |        |               |
| ESG                                                                                                                                        | 16 534    | 20.943     | 14.676 |               |
| LM alone                                                                                                                                   | 20 174    | 21.081     | 15.308 |               |
| Incremental (ESG vs LM)                                                                                                                    | 3640      | 0.138      | 0.633  | 5754          |
| Scenario 7: Alternative extrapolation for ESG (following end of the trial observation period, 20% return to baseline BMI group by year 10) |           |            |        |               |
| ESG                                                                                                                                        | 19 512    | 21.265     | 15.948 |               |
| LM alone                                                                                                                                   | 16 534    | 20.943     | 14.676 |               |
| Incremental (ESG vs LM)                                                                                                                    | 2978      | 0.321      | 1.272  | 2341          |



|                                                                                                                                             | Costs (£) | Life years | QALYs  | ICER (£/QALY) |
|---------------------------------------------------------------------------------------------------------------------------------------------|-----------|------------|--------|---------------|
| Scenario 8: Alternative extrapolation for ESG (following end of the trial observation period, 30% return to baseline BMI group by year 10)  |           |            |        |               |
| ESG                                                                                                                                         | 19 619    | 21.231     | 15.839 |               |
| LM alone                                                                                                                                    | 16 534    | 20.943     | 14.676 |               |
| Incremental (ESG vs LM)                                                                                                                     | 3086      | 0.287      | 1.163  | 2654          |
| Scenario 9: Alternative extrapolation for ESG (following end of the trial observation period, 40% return to baseline BMI group by year 10)  |           |            |        |               |
| ESG                                                                                                                                         | 19 727    | 21.197     | 15.729 |               |
| LM alone                                                                                                                                    | 16 534    | 20.943     | 14.676 |               |
| Incremental (ESG vs LM)                                                                                                                     | 3194      | 0.253      | 1.054  | 3031          |
| Scenario 10: Alternative extrapolation for ESG (following end of the trial observation period, 50% return to baseline BMI group by year 10) |           |            |        |               |
| ESG                                                                                                                                         | 19 835    | 21.163     | 15.620 |               |
| LM alone                                                                                                                                    | 16 534    | 20.943     | 14.676 |               |
| Incremental (ESG vs LM)                                                                                                                     | 3302      | 0.219      | 0.945  | 3495          |
| Scenario 11: Alternative extrapolation for ESG (following end of the trial observation period, 60% return to baseline BMI group by year 10) |           |            |        |               |
| ESG                                                                                                                                         | 19 943    | 21.129     | 15.511 |               |
| LM alone                                                                                                                                    | 16 534    | 20.943     | 14.676 |               |
| Incremental (ESG vs LM)                                                                                                                     | 3410      | 0.185      | 0.835  | 4081          |
| Scenario 12: Alternative extrapolation for ESG (following end of the trial observation period, 60% return to baseline BMI group by year 10) |           |            |        |               |
| ESG                                                                                                                                         | 20 051    | 21.094     | 15.402 |               |
| LM alone                                                                                                                                    | 16 534    | 20.943     | 14.676 |               |
| Incremental (ESG vs LM)                                                                                                                     | 3517      | 0.151      | 0.726  | 4844          |
| Scenario 13: Alternative BMI extrapolation for ESG and LM (BMI plateau following end of trial observation period)                           |           |            |        |               |
| ESG                                                                                                                                         | 19 321    | 21.324     | 16.140 |               |
| LM alone                                                                                                                                    | 16 480    | 20.959     | 14.788 |               |
| Incremental (ESG vs LM)                                                                                                                     | 2840      | 0.366      | 1.352  | 2101          |
| Scenario 14: All health state utility values from Stephenson et al, 2021 <a href="#">[5]</a>                                                |           |            |        |               |
| ESG                                                                                                                                         | 19 558    | 21.257     | 15.649 |               |
| LM alone                                                                                                                                    | 16 534    | 20.943     | 15.318 |               |
| Incremental (ESG vs LM)                                                                                                                     | 3024      | 0.314      | 0.331  | 9134          |
| Scenario 15: Use of an alternative SF-36 to EQ-5D mapping algorithm from Ara and Brazier, 2008 <a href="#">[4]</a>                          |           |            |        |               |
| ESG                                                                                                                                         | 19 558    | 21.257     | 15.625 |               |
| LM alone                                                                                                                                    | 16 534    | 20.943     | 14.259 |               |
| Incremental (ESG vs LM)                                                                                                                     | 3024      | 0.314      | 1.365  | 2215          |

|                                                                                                                             | Costs (£) | Life years | QALYs  | ICER (£/QALY) |
|-----------------------------------------------------------------------------------------------------------------------------|-----------|------------|--------|---------------|
| Scenario 16: Use of Xu et al, 2018 <a href="#">[16]</a> as an alternative source for BMI-based mortality hazard ratios      |           |            |        |               |
| ESG                                                                                                                         | 19 083    | 20.657     | 15.475 |               |
| LM alone                                                                                                                    | 15 680    | 19.913     | 13.955 |               |
| Incremental (ESG vs LM)                                                                                                     | 3403      | 0.744      | 1.520  | 2239          |
| Scenario 17: No health state mortality risk adjustment applied to general population mortality estimates (all HRs set to 1) |           |            |        |               |
| ESG                                                                                                                         | 19 977    | 21.772     | 16.279 |               |
| LM alone                                                                                                                    | 17 221    | 21.772     | 15.256 |               |
| Incremental (ESG vs LM)                                                                                                     | 2757      | 0.000      | 1.023  | 2696          |
| Scenario 18: Use of 0% discount rate for costs and outcomes                                                                 |           |            |        |               |
| ESG                                                                                                                         | 31 376    | 36.972     | 27.658 |               |
| LM alone                                                                                                                    | 28 994    | 35.988     | 25.208 |               |
| Incremental (ESG vs LM)                                                                                                     | 2382      | 0.984      | 2.450  | 972           |
| Scenario 19: Use of 6% discount rate for costs and outcomes                                                                 |           |            |        |               |
| ESG                                                                                                                         | 15 497    | 15.861     | 11.877 |               |
| LM alone                                                                                                                    | 12 198    | 15.706     | 11.009 |               |
| Incremental (ESG vs LM)                                                                                                     | 3299      | 0.156      | 0.869  | 3798          |
| Scenario 20: Use of 20-year time horizon                                                                                    |           |            |        |               |
| ESG                                                                                                                         | 14 665    | 14.758     | 11.052 |               |
| LM alone                                                                                                                    | 11 366    | 14.707     | 10.310 |               |
| Incremental (ESG vs LM)                                                                                                     | 3300      | 0.051      | 0.742  | 4449          |
| Scenario 21: Use of 10-year time horizon                                                                                    |           |            |        |               |
| ESG                                                                                                                         | 10 138    | 8.771      | 6.588  |               |
| LM alone                                                                                                                    | 6436      | 8.758      | 6.146  |               |
| Incremental (ESG vs LM)                                                                                                     | 3703      | 0.013      | 0.441  | 8390          |

*BMI* body mass index, *ESG* endoscopic sleeve gastroplasty, *ICER* incremental cost-effectiveness ratio, *LM* lifestyle management, *LY* life year, *QALY* quality-adjusted life year.

**Figure S1: Projected mortality for patients receiving ESG or lifestyle modification alone over the model time horizon**

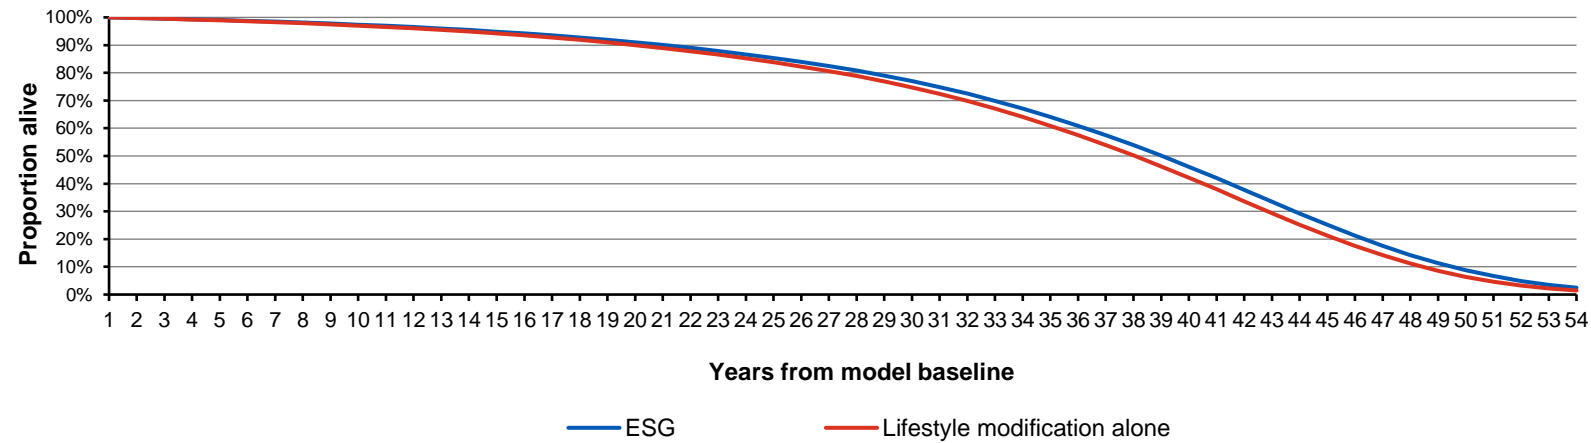

ESG endoscopic sleeve gastroplasty.

**Figure S2: Probabilistic sensitivity analysis results: incremental cost-effectiveness plane**

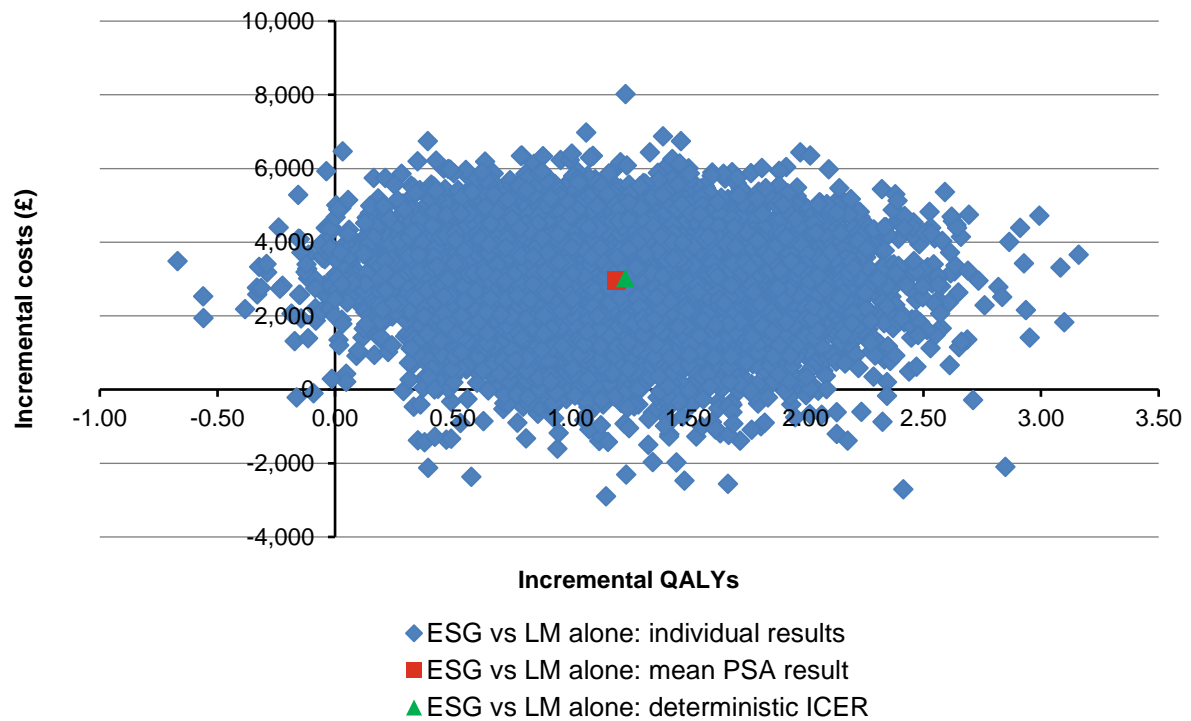

*ESG* endoscopic sleeve gastroplasty, *ICER* incremental cost-effectiveness ratio, *LM* lifestyle modification, *PSA* probabilistic sensitivity analysis, *QALY* quality-adjusted life year.

Figure S3: Probabilistic sensitivity analysis results: cost-effectiveness acceptability curve

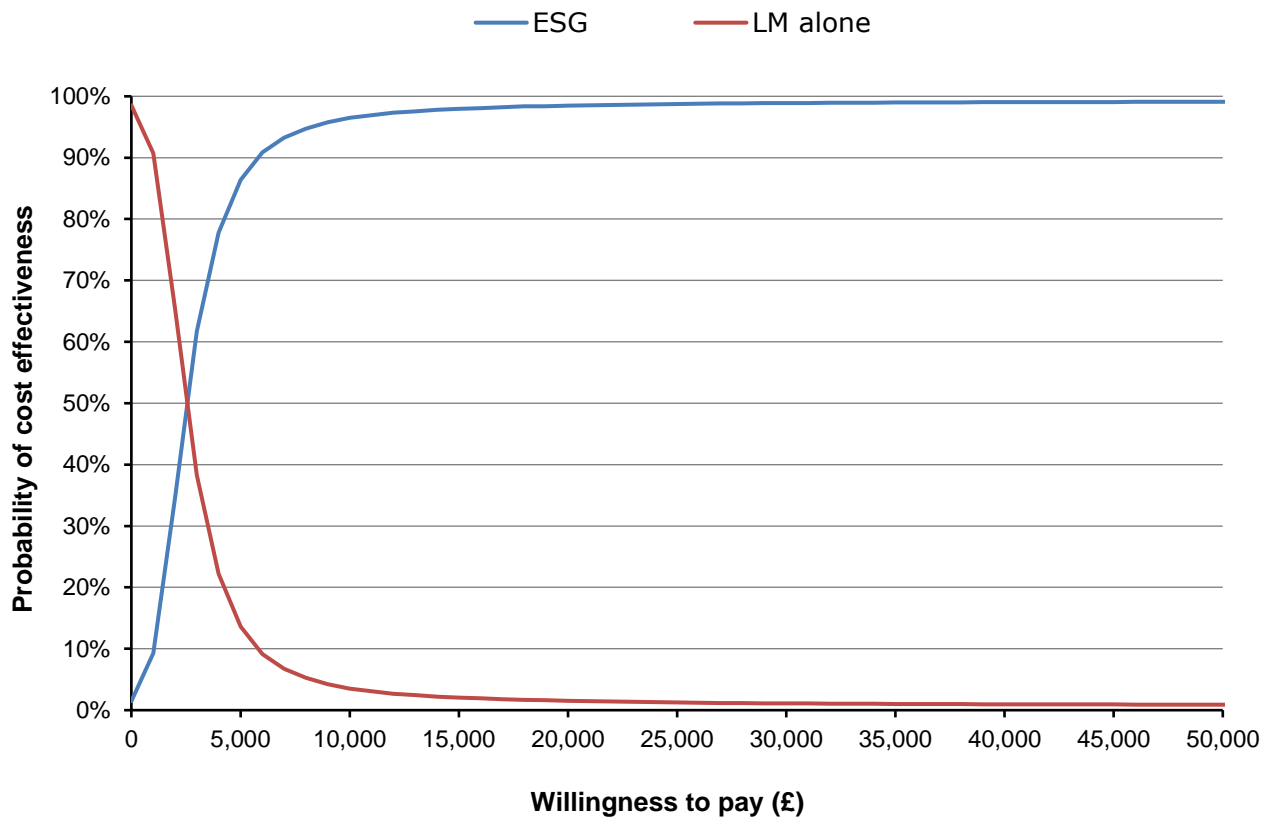

ESG endoscopic sleeve gastropasty, LM lifestyle modification.

## References

1. Husereau D, Drummond M, Augustovski F, de Bekker-Grob E, Briggs AH, Carswell C *et al*. Consolidated Health Economic Evaluation Reporting Standards 2022 (CHEERS 2022) statement: updated reporting guidance for health economic evaluations. *BMJ* 2022; **376**: e067975.
2. Apollo Endosurgery Inc. MERIT trial patient-level data. Data on File. 2022.
3. Rowen D, Brazier J, Roberts J. Mapping SF-36 onto the EQ-5D index: how reliable is the relationship? *Health Qual Life Outcomes* 2009; **7**: 27.
4. Ara R, Brazier J. Deriving an algorithm to convert the eight mean SF-36 dimension scores into a mean EQ-5D preference-based score from published studies (where patient level data are not available). *Value Health* 2008; **11**(7): 1131-43.
5. Stephenson J, Smith CM, Kearns B, Haywood A, Bissell P. The association between obesity and quality of life: a retrospective analysis of a large-scale population-based cohort study. *BMC Public Health* 2021; **21**(1): 1990.
6. Wall H, Smith C, Hubbard R. Body mass index and obstructive sleep apnoea in the UK: a cross-sectional study of the over-50s. *Prim Care Respir J* 2012; **21**(4): 371-6.
7. Vusirikala A, Thomas T, Bhala N, Tahrani AA, Thomas GN, Nirantharakumar K. Impact of obesity and metabolic health status in the development of non-alcoholic fatty liver disease (NAFLD): A United Kingdom population-based cohort study using the health improvement network (THIN). *BMC Endocr Disord* 2020; **20**(1): 96.
8. Jacobson BC, Somers SC, Fuchs CS, Kelly CP, Camargo CA, Jr. Body-mass index and symptoms of gastroesophageal reflux in women. *N Engl J Med* 2006; **354**(22): 2340-8.
9. Jones K, Burns A. Unit Costs of Health and Social Care 2021, Personal Social Services Research Unit, University of Kent, Canterbury. In, 2021.
10. NHS England. 2020/21 National Cost Collection Data Publication. 2022. <https://www.england.nhs.uk/publication/2020-21-national-cost-collection-data-publication/>.
11. National Institute of Health and Care Excellence. Committee Papers. In: Liraglutide for managing overweight and obesity. Technology appraisal guidance [TA664]. 2020. <https://www.nice.org.uk/guidance/ta664/evidence>. Accessed 18 November 2022.
12. British National Formulary. Enalapril maleate medicinal forms. 2022. <https://bnf.nice.org.uk/drugs/enalapril-maleate/medicinal-forms/>
13. British National Formulary. Lisinopril medicinal forms. 2022. <https://bnf.nice.org.uk/drugs/lisinopril/medicinal-forms/>
14. British National Formulary. Perindopril maleate medicinal forms. 2022. <https://bnf.nice.org.uk/drugs/perindopril-erbumine/medicinal-forms/>.

15. British National Formulary. Ramipril medicinal forms. 2022.  
<https://bnf.nice.org.uk/drugs/ramipril/medicinal-forms/>.
16. Xu H, Cupples LA, Stokes A, Liu CT. Association of Obesity With Mortality Over 24 Years of Weight History: Findings From the Framingham Heart Study. *JAMA Netw Open* 2018; **1**(7): e184587.
